# Supplementary material
Source: PubMed Central journal article supplement (PMC2722352)
Supplement: 0900188106_0900188106SI.pdf [file 0900188106_0900188106SI.pdf]

# Supporting Information

Coleman et al. 10.1073/pnas.0900188106

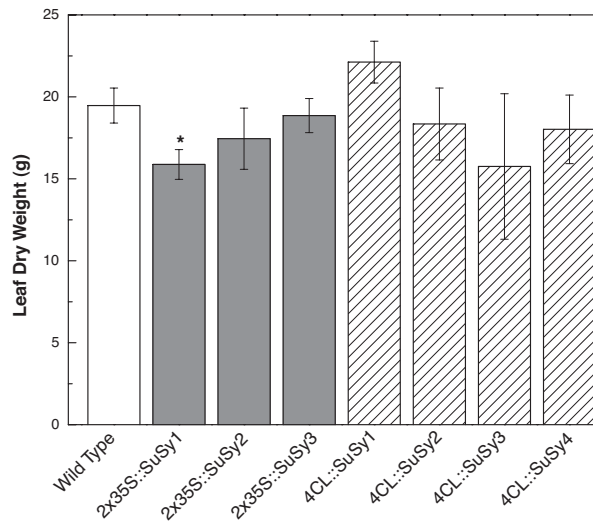

**Fig. S1.** Leaf biomass measurements of SuSy transgenic and wild-type poplar trees. Means ( $\pm$ SE) were calculated from 10 plants per line. The asterisk indicates a significant difference between the transgenic and wild-type trees at  $\alpha = 0.10$ .

**Table S1. Mean transcript abundance of native SuSy genes in leaf and developing xylem tissue for GhSuSy transgenic and wild-type poplar trees**

| Transgenic Line        | SuSy 1 Transcript Level $\Delta$ Ct |                           | SuSy 2 Transcript Level $\Delta$ Ct |                  |
|------------------------|-------------------------------------|---------------------------|-------------------------------------|------------------|
|                        | Leaf                                | Developing xylem          | Leaf                                | Developing xylem |
| Control                | 2.91 (0.22)                         | 7.46 (1.12)               | 0.91 (0.09)                         | 0.14 (0.06)      |
| 2 $\times$ 35S::SuSy 1 | 6.14 (1.38)                         | 10.88 (4.01)              | 1.27 (0.26)                         | 0.12 (0.01)      |
| 2 $\times$ 35S::SuSy 2 | 5.24 (1.03)                         | 18.94 (0.26) <sup>†</sup> | 1.21 (0.21)                         | 0.50 (0.09)      |
| 2 $\times$ 35S::SuSy 3 | 3.79 (0.47)                         | 12.68 (8.65)              | 1.09 (0.05)                         | 0.21 (0.09)      |
| 4CL::SuSy 1            | 5.36 (1.48)                         | 15.21 (5.51)              | 0.84 (0.35)                         | 0.51 (0.27)      |
| 4CL::SuSy 2            | 5.90 (2.08)                         | 19.66 (3.36) <sup>†</sup> | 0.50 (0.27)                         | 0.14 (0.03)      |
| 4CL::SuSy 3            | 4.25 (0.13) <sup>*†</sup>           | 19.90 (4.13)              | 1.03 (0.24)                         | 0.18 (0.08)      |
| 4CL::SuSy 4            | 4.71 (0.36) <sup>*†</sup>           | 19.04 (5.46)              | 1.12 (0.19)                         | 0.35 (0.10)      |

Mean (SE) values were calculated from 3 plants per line. \*, significance at  $\alpha = 0.05$ ; †, significant difference from control values at  $\alpha = 0.10$ .
